# Supplementary material
Source: publisher figshare collection journal article supplement (https://acs.figshare.com/ndownloader/files/5867334)
Supplement: Supplementary file 1 [file 5867334]

## Supporting Information.

1'-Cyano-3,4-dimethoxybenzylamine (**2**). To a solution of sodium cyanide (2.5 g, 50 mmol) and ammonium chloride (3.0 g, 56 mmol) in concentrated  $\text{NH}_4\text{OH}$  (30%, 57 mL) was added a solution of 3,4-dimethoxybenzaldehyde (8.5 g, 50 mmol) in methanol (25 mL). After stirring overnight under argon, a pale yellow solid was removed by filtration; the filtrate was evaporated to a yellow suspension, which was diluted with water (100 mL) and extracted with ethyl acetate (5 x 100 mL). The organic phases (which contained a *uv* active spot with  $R_f \approx 0.2$  in  $\text{CH}_2\text{Cl}_2$ ; aldehyde at  $R_f \approx 0.9$ ) were collected and dried, yielding an oil on removal of the solvent *in vacuo*. A portion of the crude product was purified by chromatography on silica (elution with 80:1 dichloromethane/methanol), to give **2**:  $^1\text{H}$  NMR ( $\text{CDCl}_3$ )  $\delta$  7.03 (d, 1H), 7.01 (s, 1H), 6.85 (d, 1H), 3.88 (s, 3H), 3.86 (s, 3H), 1.94 (s, 2H);  $^{13}\text{C}$  NMR ( $\text{CDCl}_3$ )  $\delta$  150.3, 150.2, 129.6, 121.9, 119.8, 112.0, 110.5, 56.8, 56.8, 47.8.

3,4-Dimethoxyphenylglycine hydrochloride (**3**). Crude **2** (0.49 g, 2.95 mmol) was extracted into 6 *M* hydrochloric acid as its hydrochloride salt (2 x 60 mL) and refluxed for 2.5 h. The solution was concentrated *in vacuo*. Filtration of the resulting yellow suspension gave **3** as a white solid (0.43 g, 69%). The filtrate was further concentrated *in vacuo* and gave a second crop of **3** on cooling (0.13 g, 20%):  $^1\text{H}$  NMR ( $\text{DMSO}-d_6$ )  $\delta$  7.06 (s, 1H), 6.95 (apparent br s, 2H), 4.58 (s, 1H), 3.74 (s, 6H).

(*N*-4'-carboxybenzenesulfonyl)-3,4-dimethoxyphenylglycine (**4**). To a solution of **3** (110 mg, 0.52 mmol) in water (4 mL, pH 10) was added a few drops of a solution of 4-(chlorosulfonyl)benzoic acid (120 mg, 0.52 mmol) in THF (2 mL) with stirring. The pH of the reaction mixture was adjusted to 8 by the addition of 1 *N* NaOH. The sulfonyl chloride and base were added

alternately, to maintain pH > 8 throughout the reaction. The reaction was diluted with water and extracted with ether (3 x 20 mL). The solvent was removed *in vacuo* to afford 126 mg of **4** (61%) as a white solid:  $^1\text{H}$  NMR (acetone- $d_6$ )  $\delta$  8.05 (d, 2H), 7.86 (d, 2H), 7.58 (d, 1H), 6.84 (m, 3H), 5.08 (d, 1H), 3.74 (s, 3H), 3.69 (s, 3H);  $^{13}\text{C}$  NMR (acetone- $d_6$ )  $\delta$  171.3, 166.5, 150.3, 150.2, 145.1, 134.4, 130.6, 129.3, 127.9, 121.0, 112.4, 111.6, 60.3, 56.0, 55.9.

Pentafluorobenzylamide of **4** (**5**). To a  $\text{CH}_3\text{CN}$  suspension of **4** (126 mg, 0.32 mmol in 2.7 mL) was added TBTU (103 mg, 0.32 mmol) and triethylamine (89  $\mu\text{L}$ , 0.64 mmol), affording a pale yellow solution. After stirring o/n at room temperature, the solvent was removed *in vacuo* to give 250 mg of pale yellow solid. The amide was purified by column chromatography with a gradient of  $\text{CH}_2\text{Cl}_2/\text{CH}_3\text{OH}$ , affording **5** as a white solid (18%):  $^1\text{H}$  NMR (acetone- $d_6$ )  $\delta$  8.48 (t, 1H), 7.93 (d, 2H), 7.81 (d, 2H), 7.60 (d, 1H), 6.87 (s, 1H), 6.79 (apparent br s, 2H), 5.02 (br s, 1H), 4.75 (d, 2H), 3.74 (s, 3H), 3.70 (s, 3H).

Nitration of **5** (**1**). Dissolution of **5** (30 mg) in concentrated HOAc (1.0 mL) and addition of concentrated  $\text{HNO}_3$  (0.5 mL) gave an orange solution, which was stirred at room temperature overnight. Dilution with water (30 mL) afforded a pale yellow solid, which was purified by column chromatography with a gradient of  $\text{CH}_2\text{Cl}_2/\text{CH}_3\text{OH}$ , affording **1** as a pale yellow solid (16.8 mg, 48%):  $^1\text{H}$  NMR (acetone- $d_6$ )  $\delta$  8.48 (br, 1H), 7.93 (d, 2H), 7.83 (d, 2H), 7.68 (d, 1H), 7.53 (s, 1H), 7.11 (s, 1H), 5.91 (d, 1H), 4.75 (br, 2H), 3.89 (s, 3H), 3.86 (s, 3H).  $^{13}\text{C}$  NMR (acetone- $d_6$ )  $\delta$  168.9, 165.8, 154.3, 149.6, 144.5, 138.2, 128.5, 127.8, 127.7, 126.8, 113.4, 109.0, 62.5, 57.8, 56.7, 56.5 (note that carbons of pentafluorobenzyl ring are not resolved, due to  $\alpha$ ,  $\beta$  and  $\gamma$  coupling to fluorines).
